# Supplementary material
Source: PubMed Central journal article supplement (PMC4132867)
Supplement: ct500107y_si_001.pdf [file ct500107y_si_001.pdf]

**Supplemental Material to Accompany:**

# **The influence of sequence and covalent modifications on yeast tRNA dynamics**

**Xiaoju Zhang,<sup>1</sup> Ross C. Walker,<sup>2,3</sup> Eric M. Phizicky,<sup>1</sup> and David H. Mathews<sup>1</sup>**

<sup>1</sup>Department of Biochemistry and Biophysics and Center for RNA Biology, University of Rochester Medical Center, Rochester, New York

<sup>2</sup>San Diego Supercomputer Center, University of California San Diego, 9500 Gilman Drive, La Jolla, California, 92093-0505, USA.

<sup>3</sup>Department of Chemistry and Biochemistry, University of California San Diego, 9500 Gilman Drive, La Jolla, California, 92093

Figure S1a. tRNA<sup>Asp</sup>

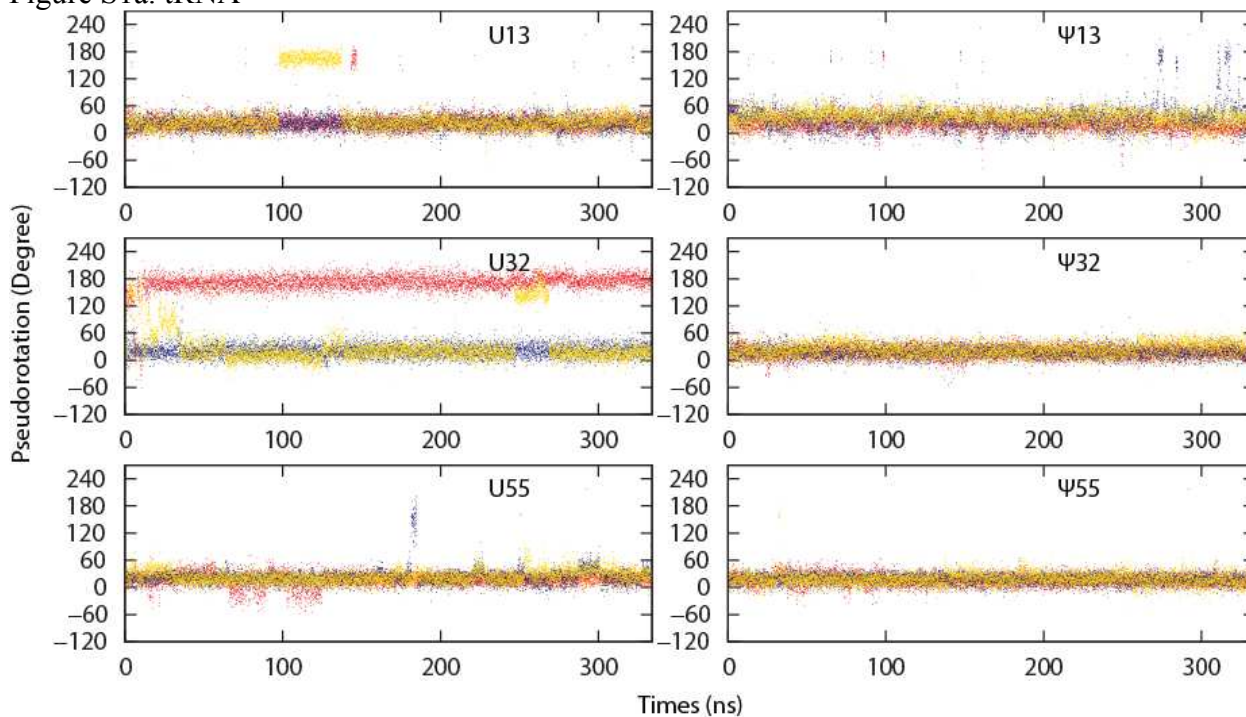

Figure S1b. tRNA<sup>Phe</sup>

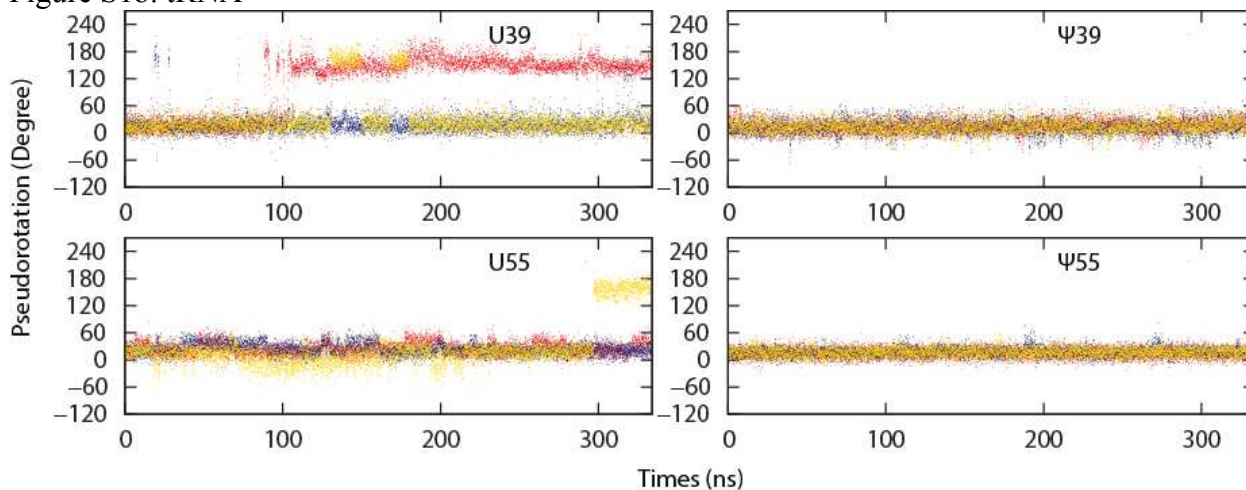

Figure S1. Sugar pucker pseudorotation values as function of time for U or Ψ base. a). The left column shows unmodified tRNA<sup>Asp</sup>, and the right column shows corresponding modified tRNA<sup>Asp</sup>. From top to bottom, plots for bases at position 13, 32 and 55 are listed, and each panel has three independent trajectories plotted, in red, yellow or blue. b). The left column shows unmodified tRNA<sup>Phe</sup>, and the right column shows corresponding modified tRNA<sup>Phe</sup>. From top to bottom, plots for bases at position 39 and 55 are listed, and each panel has three independent trajectories plotted, colored with red, yellow or blue.

Figure S2a. tRNA<sup>Asp</sup>

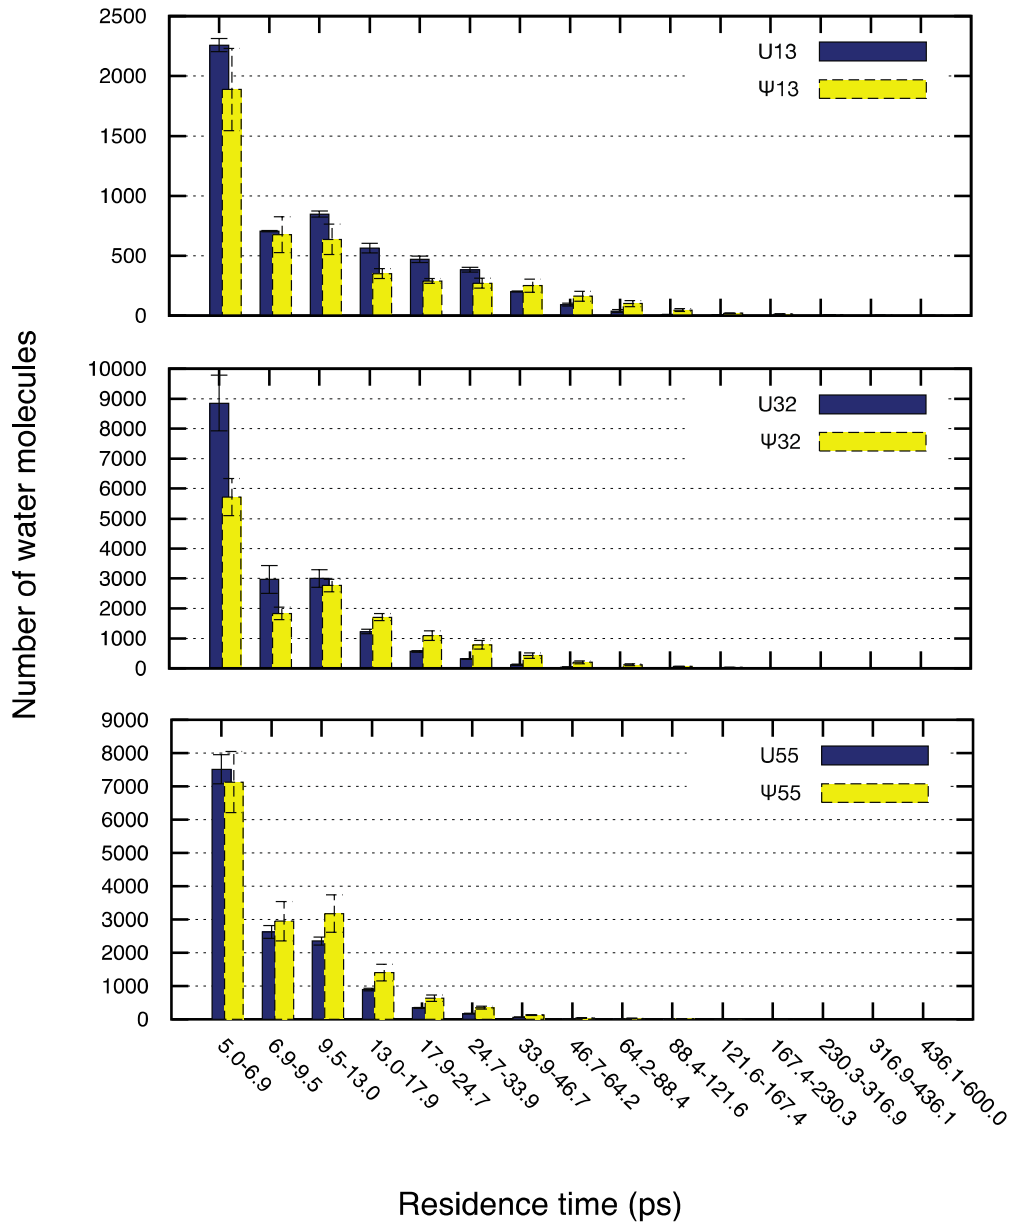

Figure S2b. tRNA<sup>Phe</sup>

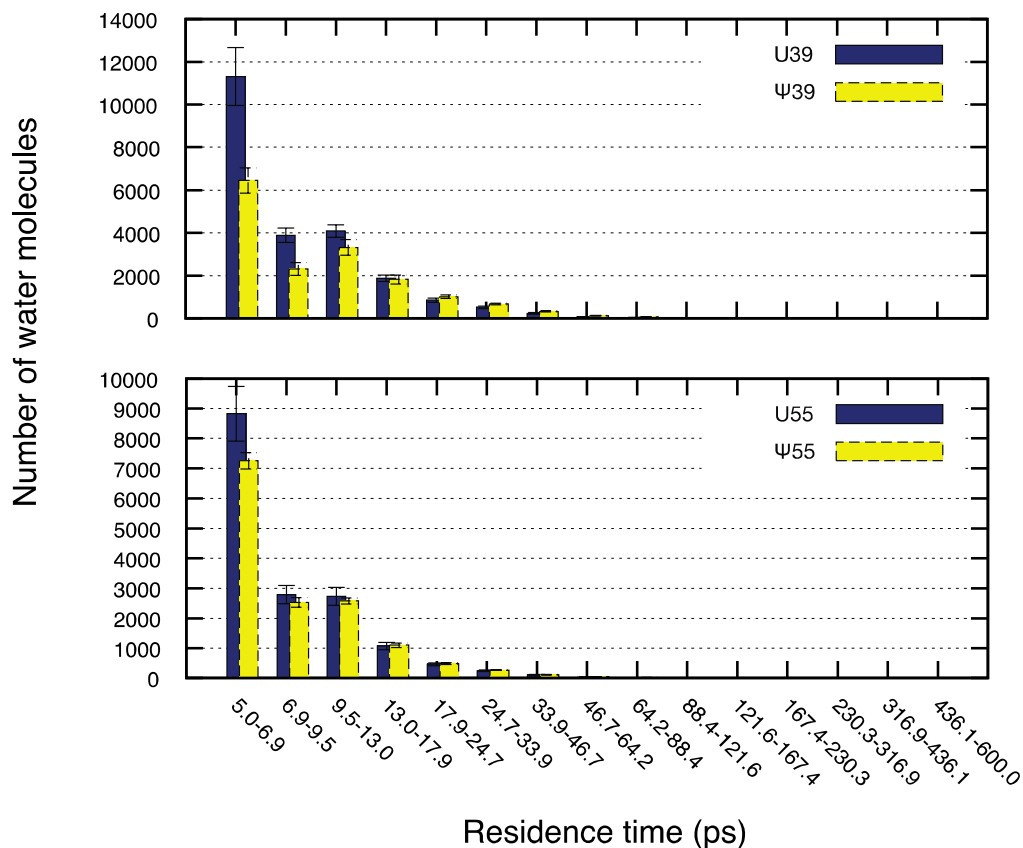

Figure S2. The averaged distribution of U or Ψ base water residence time with the full range of residence times. The frequency is averaged from three trajectories of each molecule, and the error bars represent standard error. a). From top to bottom, plots for bases at position 13, 32 and 55 of tRNA<sup>Asp</sup> are provided, with unmodified tRNA<sup>Asp</sup> plotted in blue and modified tRNA<sup>Asp</sup> plotted in yellow. b). From top to bottom, plots for bases at position 39 and 55 tRNA<sup>Phe</sup> are provided, with unmodified tRNA<sup>Phe</sup> plotted in blue and modified tRNA<sup>Phe</sup> plotted in yellow.

Supplemental Table 1 Missing parameter assignments

## Bond Parameters

| bond    | $k_r^a$ | $r_{eq}^b$ | source                   |
|---------|---------|------------|--------------------------|
| N* - CQ | 470.3   | 1.35       | GAFF: ca-na              |
| N* - CA | 426     | 1.38       | GAFF: n -cd <sup>i</sup> |
| NA - CM | 426     | 1.38       | GAFF: cd-n               |
| CA - N  | 372.3   | 1.422      | GAFF: ca-n               |
| N* - CC | 390.5   | 1.407      | GAFF: c2-n               |
| CC - CC | 589.7   | 1.324      | GAFF: c2-c2              |
| P - HO  | 300     | 2.12       | See note <sup>j</sup>    |

## Angle Parameters

| angle        | $k_\theta^c$ | $\theta_{eq}^d$ | source                                   |
|--------------|--------------|-----------------|------------------------------------------|
| CB - C - N*  | 70.2         | 111.86          | GAFF: cd-c -na/n                         |
| CB - C - N   | 70.2         | 111.86          | GAFF: cd-c -n                            |
| C - N* - CQ  | 65.3         | 125.2           | GAFF: c -na-ca                           |
| N - C - N*   | 75.4         | 111.7           | GAFF: n -c -na/n                         |
| N* - CQ - NC | 69.7         | 123.86          | GAFF: na/n -ca-nc                        |
| N* - CQ - H5 | 51.3         | 119.23          | GAFF: h5-ca-nb and h5-ca-nc <sup>i</sup> |
| CT - N* - CQ | 63.1         | 124.36          | GAFF: c3 - na - ca                       |
| C - N* - CA  | 65.2         | 124.19          | GAFF: c -n -cd                           |
| N* - CA - NC | 70.9         | 123.86          | GAFF: n -cd-nc                           |
| N* - CA - N2 | 72.2         | 117.01          | GAFF: n -cd-nh                           |
| CT - N* - CA | 63.3         | 121.17          | GAFF: c3-n -cd                           |
| CT - CM - CA | 64.7         | 115.97          | GAFF: c3-cd-cd                           |
| N* - CK - N* | 73.7         | 109.33          | GAFF: na-c2-na                           |
| N* - CB - C  | 64.3         | 130.8           | GAFF: c -cc-nc                           |
| CT - N* - CT | 62.7         | 119.26          | GAFF: c3-na-c3 and c3-n -c3 <sup>j</sup> |
| N* - C - N   | 75.4         | 111.7           | GAFF: n -c -n                            |
| C - N - C    | 67.4         | 119.63          | GAFF: c -n -c                            |
| CT - N2 - CT | 63.5         | 114.54          | GAFF: c3-nh-c3                           |
| NA - CM - CM | 67.9         | 119.89          | GAFF: cd-cd-n                            |
| NA - CM - H4 | 50.4         | 117.62          | GAFF: h4-cd-n                            |
| NA - C - NA  | 75.4         | 111.7           | GAFF: n -c -n                            |
| H - NA - CM  | 47.5         | 121.52          | GAFF: cd-n -hn                           |
| CM - NA - C  | 65.2         | 124.19          | GAFF: c -n -cd                           |
| CB - CA - N  | 68           | 119.89          | GAFF: ca-ca-n                            |
| CA - N - C   | 64.3         | 123.71          | GAFF: c -n -ca                           |
| CA - N - H   | 47.6         | 114.59          | GAFF: ca-n -hn                           |

|              |      |        |                                                    |
|--------------|------|--------|----------------------------------------------------|
| N - CA - NC  | 71.6 | 123.8  | GAFF: nb-ca-nb, nb-ca-nc and nb-ca-nh <sup>j</sup> |
| N - C - N    | 75.4 | 111.7  | GAFF: n -c -n                                      |
| OH - C - O2  | 77.4 | 122.88 | GAFF: o -c -oh                                     |
| N* - CB - N* | 74.2 | 107.38 | GAFF: na-c2-na and n -c2-na <sup>j</sup>           |
| C - N* - CB  | 64.3 | 125.09 | GAFF: c -na-c2                                     |
| C - N* - CC  | 64.3 | 125.09 | GAFF: c -na-c2                                     |
| N* - CB - NB | 71.7 | 123.62 | GAFF: n2-c2-na                                     |
| N* - CC - CC | 69.8 | 121.38 | GAFF: c2-c2-na                                     |
| N* - CC - CT | 65   | 122.54 | GAFF: c3-c2-na                                     |
| CB - N* - CC | 67.8 | 110.37 | GAFF: c2-na-c2                                     |
| CB - N* - CB | 67.8 | 110.37 | GAFF: c2-na-c2                                     |
| CB - NB - CC | 70.8 | 118.18 | GAFF: c2-n2-c2                                     |
| NB - CC - CC | 71.3 | 126.01 | GAFF: c2-c2-n2                                     |
| CT - CC - CC | 64.3 | 123.42 | GAFF: c2-c2-c3                                     |
| N - C - OS   | 74.7 | 115.25 | GAFF: n -c -os                                     |
| P - HO - OH  | 0    | 0      | See note <sup>k</sup>                              |
| O2 - P - HO  | 0    | 0      | See note <sup>k</sup>                              |
| OS - P - HO  | 0    | 0      | See note <sup>k</sup>                              |
| OH - P - HO  | 0    | 0      | See note <sup>k</sup>                              |

#### Dihedral Parameters

| dihedral    | no. of paths <sup>e</sup> | Magnitude <sup>f</sup> | phase offset <sup>g</sup> | Periodicity <sup>h</sup> | source                |
|-------------|---------------------------|------------------------|---------------------------|--------------------------|-----------------------|
| X -N*-CQ- X | 4                         | 1.2                    | 180                       | 2                        | GAFF: X -ca-na-X      |
| X -N*-CA- X | 4                         | 6.6                    | 180                       | 2                        | GAFF: X -n -cd-X      |
| X -NA-CM- X | 4                         | 6.6                    | 180                       | 2                        | GAFF: X -n -cc-X      |
| X -CA-N - X | 4                         | 1.8                    | 180                       | 2                        | GAFF: X -ca-n -X      |
| X -N*-CC- X | 4                         | 2.6                    | 180                       | 2                        | GAFF: X -c2-n -X      |
| X -CC-CC- X | 4                         | 26.6                   | 180                       | 2                        | GAFF: X -c2-c2-X      |
| OS-P -HO-OH | 2                         | 0                      | 0                         | 2                        | See note <sup>k</sup> |
| O2-P -HO-OH | 2                         | 0                      | 0                         | 2                        | See note <sup>k</sup> |

<sup>a</sup> Bond force constant in kcal/(mol Å<sup>2</sup>). <sup>b</sup> Bond equilibrium value in Å. <sup>c</sup> Angle force constant in kcal/(mol radian<sup>2</sup>). <sup>d</sup> Angle equilibrium value in degrees. <sup>e</sup> Number of bond paths that the total magnitude of torsion is divided into, which is equal to the product of the number of bonds to each of the middle two atoms. <sup>f</sup> Magnitude of torsion in kcal/mol. <sup>g</sup> Phase offset in degrees. <sup>h</sup> Periodicity of torsion. <sup>i</sup> "N\*" atom type has two possible GAFF atom types: "na" and "n," however, in this particular case N\* - CA only occurs in the1MG residue, and it was assigned as n -cd. <sup>j</sup> The parameter of GAFF assigned atom types are missing in GAFF force field, so the value is the average of all reasonable analogies. They are: N\* - CQ - H5, CT - N\* - CT, N - CA - NC, and N\* - CB - N\*. <sup>k</sup> Derived from Tim Meyer's and David Case's force field library for tRNA<sup>Phe</sup>, which was contributed to the AMBER parameter database:

<http://www.pharmacy.manchester.ac.uk/bryce/amber>.

Supplemental Table 2 Partial charges

| 5'- phosphate A |           | 5'- phosphate G |           | 5'- phosphate U |           | m <sup>1</sup> A |           |
|-----------------|-----------|-----------------|-----------|-----------------|-----------|------------------|-----------|
| Atom            | Charge    | Atom            | Charge    | Atom            | Charge    | Atom             | Charge    |
| H5T             | 0.409864  | H5T             | 0.397689  | H5T             | 0.427626  | P                | 1.1662    |
| O3P             | -0.749592 | O3P             | -0.739785 | O3P             | -0.684482 | O1P              | -0.776    |
| P               | 1.665315  | P               | 1.686837  | P               | 1.462946  | O2P              | -0.776    |
| O1P             | -0.919627 | O1P             | -0.916682 | O1P             | -0.857648 | O5'              | -0.4989   |
| O2P             | -0.919627 | O2P             | -0.916682 | O2P             | -0.857648 | C5'              | 0.0558    |
| O5'             | -0.679133 | O5'             | -0.704177 | O5'             | -0.683594 | H5'1             | 0.0679    |
| C5'             | 0.0558    | C5'             | 0.0558    | C5'             | 0.0558    | H5'2             | 0.0679    |
| H5'1            | 0.0679    | H5'1            | 0.0679    | H5'2            | 0.0679    | C4'              | 0.1065    |
| H5'2            | 0.0679    | H5'2            | 0.0679    | H5'1            | 0.0679    | H4'              | 0.1174    |
| C4'             | 0.1065    | C4'             | 0.1065    | C4'             | 0.1065    | O4'              | -0.3548   |
| H4'             | 0.1174    | H4'             | 0.1174    | H4'             | 0.1174    | C1'              | 0.096366  |
| O4'             | -0.3548   | O4'             | -0.3548   | O4'             | -0.3548   | H1'              | 0.131302  |
| C1'             | 0.0394    | C1'             | 0.0191    | C1'             | 0.0674    | N9               | -0.12752  |
| H1'             | 0.2007    | H1'             | 0.2006    | H1'             | 0.1824    | C8               | 0.253186  |
| C2'             | 0.067     | C2'             | 0.067     | C2'             | 0.067     | H8               | 0.126154  |
| H2'1            | 0.0972    | H2'1            | 0.0972    | H2'1            | 0.0972    | N7               | -0.596846 |
| O2'             | -0.6139   | O2'             | -0.6139   | O2'             | -0.6139   | C5               | 0.00869   |
| HO'2            | 0.4186    | HO'2            | 0.4186    | HO'2            | 0.4186    | C6               | 0.550704  |
| N9              | -0.0251   | N9              | 0.0492    | N1              | 0.0418    | N6               | -0.862164 |
| C4              | 0.3053    | C4              | 0.1222    | C2              | 0.4687    | HN62             | 0.397056  |
| C5              | 0.0515    | C5              | 0.1744    | O2              | -0.5477   | N1               | -0.140304 |
| C6              | 0.7009    | C6              | 0.477     | N3              | -0.3549   | CM1              | -0.228134 |
| N1              | -0.7615   | O6              | -0.5597   | H3              | 0.3154    | HM11             | 0.118139  |
| C2              | 0.5875    | N1              | -0.4787   | C4              | 0.5952    | HM12             | 0.118139  |
| H2              | 0.0473    | H1              | 0.3424    | O4              | -0.5761   | HM13             | 0.118139  |
| N6              | -0.9019   | C2              | 0.7657    | C5              | -0.3635   | C2               | 0.239943  |
| H61             | 0.4115    | N2              | -0.9672   | H5              | 0.1811    | H2               | 0.143205  |
| H62             | 0.4115    | H21             | 0.4364    | C6              | -0.1126   | N3               | -0.59396  |
| N7              | -0.6073   | H22             | 0.4364    | H6              | 0.2188    | C4               | 0.363905  |
| N3              | -0.6997   | N7              | -0.5709   | C3'             | 0.2022    | C3'              | 0.2022    |
| C8              | 0.2006    | N3              | -0.6323   | H3'             | 0.0615    | H3'              | 0.0615    |
| H8              | 0.1553    | C8              | 0.1374    | O3'             | -0.5246   | C2'              | 0.067     |
| C3'             | 0.2022    | H8              | 0.164     |                 |           | H2'1             | 0.0972    |
| H3'             | 0.0615    | C3'             | 0.2022    |                 |           | O2'              | -0.6139   |
| O3'             | -0.5246   | H3'             | 0.0615    |                 |           | HO'2             | 0.4186    |
|                 |           | O3'             | -0.5246   |                 |           | O3'              | -0.5246   |

| m <sup>1</sup> G |           | m <sup>2</sup> G |           | m <sup>5</sup> C |           | m <sup>5</sup> U |           |
|------------------|-----------|------------------|-----------|------------------|-----------|------------------|-----------|
| Atom             | Charge    | Atom             | Charge    | Atom             | Charge    | Atom             | Charge    |
| P                | 1.1662    | P                | 1.1662    | P                | 1.1662    | P                | 1.1662    |
| O1P              | -0.776    | O1P              | -0.776    | O1P              | -0.776    | O1P              | -0.776    |
| O2P              | -0.776    | O2P              | -0.776    | O2P              | -0.776    | O2P              | -0.776    |
| O5'              | -0.4989   | O5'              | -0.4989   | O5'              | -0.4989   | O5'              | -0.4989   |
| C5'              | 0.0558    | C5'              | 0.0558    | C5'              | 0.0558    | C5'              | 0.0558    |
| H5'1             | 0.0679    | H5'1             | 0.0679    | H5'1             | 0.0679    | H5'1             | 0.0679    |
| H5'2             | 0.0679    | H5'2             | 0.0679    | H5'2             | 0.0679    | H5'2             | 0.0679    |
| C4'              | 0.1065    | C4'              | 0.1065    | C4'              | 0.1065    | C4'              | 0.1065    |
| H4'              | 0.1174    | H4'              | 0.1174    | H4'              | 0.1174    | H4'              | 0.1174    |
| O4'              | -0.3548   | O4'              | -0.3548   | O4'              | -0.3548   | O4'              | -0.3548   |
| C1'              | 0.09816   | C1'              | 0.068321  | C1'              | -0.002514 | C1'              | 0.127486  |
| H1'              | 0.142091  | H1'              | 0.167336  | H1'              | 0.223447  | H1'              | 0.152768  |
| N9               | -0.024806 | N9               | -0.050463 | N1               | -0.159492 | N1               | -0.138087 |
| C8               | 0.037228  | C8               | 0.231962  | C6               | -0.173051 | C6               | -0.338213 |
| H8               | 0.182333  | H8               | 0.137729  | H6               | 0.324799  | H6               | 0.282658  |
| N7               | -0.496069 | N7               | -0.588617 | C5               | -0.223284 | C5               | -0.007369 |
| C5               | 0.040707  | C5               | 0.021564  | CM5              | -0.236056 | CM5              | -0.332308 |
| C6               | 0.521633  | C6               | 0.785635  | HM51             | 0.079647  | HM51             | -0.145382 |
| O6               | -0.53576  | O6               | -0.599002 | HM52             | 0.079647  | HM52             | 0.415261  |
| N1               | -0.191741 | N1               | -0.847781 | HM53             | 0.079647  | HM53             | 0.415261  |
| CM1              | -0.077609 | H1               | 0.398301  | C4               | 0.874761  | C4               | 0.415261  |
| HM11             | 0.079562  | C2               | 0.877651  | N4               | -1.001064 | O4               | -0.594517 |
| HM12             | 0.079562  | N2               | -0.691322 | H41              | 0.424898  | N3               | -0.729305 |
| HM13             | 0.079562  | H21              | 0.396574  | H42              | 0.424898  | H3               | 0.395007  |
| C2               | 0.607242  | CM2              | -0.073693 | N3               | -0.830303 | C2               | 0.803672  |
| N2               | -0.851637 | HM21             | 0.087021  | C2               | 0.85586   | O2               | -0.606193 |
| H21              | 0.379544  | HM22             | 0.087021  | O2               | -0.62584  | C3'              | 0.2022    |
| H22              | 0.379544  | HM23             | 0.087021  | C3'              | 0.2022    | H3'              | 0.0615    |
| N3               | -0.593016 | N3               | -0.571886 | H3'              | 0.0615    | C2'              | 0.067     |
| C4               | 0.25947   | C4               | 0.192628  | C2'              | 0.067     | H2'1             | 0.0972    |
| C3'              | 0.2022    | C3'              | 0.2022    | H2'1             | 0.0972    | O2'              | -0.6139   |
| H3'              | 0.0615    | H3'              | 0.0615    | O2'              | -0.6139   | HO'2             | 0.4186    |
| C2'              | 0.067     | C2'              | 0.067     | HO'2             | 0.4186    | O3'              | -0.5246   |
| H2'1             | 0.0972    | H2'1             | 0.0972    | O3'              | -0.5246   |                  |           |
| O2'              | -0.6139   | O2'              | -0.6139   |                  |           |                  |           |
| HO'2             | 0.4186    | HO'2             | 0.4186    |                  |           |                  |           |
| O3'              | -0.5246   | O3'              | -0.5246   |                  |           |                  |           |



| D    |           | Cm   |           | Gm   |           | Ψ    |           |
|------|-----------|------|-----------|------|-----------|------|-----------|
| Atom | Charge    | Atom | Charge    | Atom | Charge    | Atom | Charge    |
| P    | 1.1662    | P    | 1.1662    | P    | 1.1662    | P    | 1.1662    |
| O1P  | -0.776    | O1P  | -0.776    | O1P  | -0.776    | O1P  | -0.776    |
| O2P  | -0.776    | O2P  | -0.776    | O2P  | -0.776    | O2P  | -0.776    |
| O5'  | -0.4989   | O5'  | -0.4989   | O5'  | -0.4989   | O5'  | -0.4989   |
| C5'  | 0.0558    | C5'  | 0.057167  | C5'  | 0.007835  | C5'  | 0.0558    |
| H5'1 | 0.0679    | H5'1 | 0.069407  | H5'1 | 0.103793  | H5'1 | 0.0679    |
| H5'2 | 0.0679    | H5'2 | 0.069407  | H5'2 | 0.103793  | H5'2 | 0.0679    |
| C4'  | 0.1065    | C4'  | 0.237211  | C4'  | 0.049736  | C4'  | 0.1065    |
| H4'  | 0.1174    | H4'  | 0.016263  | H4'  | 0.094709  | H4'  | 0.1174    |
| O4'  | -0.3548   | O4'  | -0.34379  | O4'  | -0.441272 | O4'  | -0.3548   |
| C1'  | 0.025251  | C1'  | -0.052069 | C1'  | 0.326094  | C1'  | -0.042993 |
| H1'  | 0.206415  | H1'  | 0.199764  | H1'  | 0.05097   | H1'  | 0.179765  |
| N1   | -0.325289 | N1   | -0.0484   | N9   | 0.0492    | N1   | -0.479198 |
| C6   | 0.35287   | C6   | 0.0053    | C8   | 0.1374    | H1   | 0.35505   |
| H61  | -0.018653 | H6   | 0.1958    | H8   | 0.164     | C6   | 0.03412   |
| H62  | -0.018653 | C5   | -0.5215   | N7   | -0.5709   | H6   | 0.145461  |
| C5   | -0.406811 | H5   | 0.1928    | C5   | 0.1744    | C5   | -0.178682 |
| H51  | 0.137176  | C4   | 0.8185    | C6   | 0.477     | C4   | 0.745914  |
| H52  | 0.137176  | N4   | -0.953    | O6   | -0.5597   | O4   | -0.550401 |
| C4   | 0.780503  | HN41 | 0.4234    | N1   | -0.4787   | N3   | -0.645585 |
| O4   | -0.596282 | HN42 | 0.4234    | H1   | 0.3424    | H3   | 0.369073  |
| N3   | -0.730344 | N3   | -0.7584   | C2   | 0.7657    | C2   | 0.799618  |
| HN3  | 0.389263  | C2   | 0.7538    | N2   | -0.9672   | O2   | -0.616142 |
| C2   | 0.786488  | O2   | -0.6252   | HN21 | 0.4364    | C3'  | 0.2022    |
| O2   | -0.60311  | C3'  | 0.15863   | HN22 | 0.4364    | H3'  | 0.0615    |
| C3'  | 0.2022    | H3'  | 0.098689  | N3   | -0.6323   | C2'  | 0.067     |
| H3'  | 0.0615    | C2'  | -0.050237 | C4   | 0.1222    | H2'1 | 0.0972    |
| C2'  | 0.067     | H2'1 | 0.158115  | C3'  | 0.327771  | O2'  | -0.6139   |
| H2'1 | 0.0972    | O2'  | -0.31312  | H3'  | 0.015523  | HO'2 | 0.4186    |
| O2'  | -0.6139   | CM2  | -0.054982 | C2'  | -0.012428 | O3'  | -0.5246   |
| HO'2 | 0.4186    | HM21 | 0.084115  | H2'1 | 0.058128  |      |           |
| O3'  | -0.5246   | HM22 | 0.084115  | O2'  | -0.365119 |      |           |
|      |           | HM23 | 0.084115  | CM2  | -0.049974 |      |           |
|      |           | O3'  | -0.5246   | HM21 | 0.081147  |      |           |
|      |           |      |           | HM22 | 0.081147  |      |           |
|      |           |      |           | HM23 | 0.081147  |      |           |
|      |           |      |           | O3'  | -0.5246   |      |           |

| <b>m<sup>2</sup>G</b> |               | <b>m<sup>7</sup>G</b> |               | <b>Ar(p)</b> |               |             |               |
|-----------------------|---------------|-----------------------|---------------|--------------|---------------|-------------|---------------|
| <b>Atom</b>           | <b>Charge</b> | <b>Atom</b>           | <b>Charge</b> | <b>Atom</b>  | <b>Charge</b> | <b>Atom</b> | <b>Charge</b> |
| P                     | 1.1662        | P                     | 1.1662        | P            | 1.1662        | N1          | -0.7615       |
| O1P                   | -0.776        | O1P                   | -0.776        | O1P          | -0.776        | C2          | 0.5875        |
| O2P                   | -0.776        | O2P                   | -0.776        | O2P          | -0.776        | H2          | 0.0473        |
| O5'                   | -0.4989       | O5'                   | -0.4989       | O5A          | -0.4989       | N6          | -0.9019       |
| C5'                   | 0.0558        | C5'                   | 0.0558        | C5A          | -0.015008     | HN61        | 0.4115        |
| H5'1                  | 0.0679        | H5'1                  | 0.0679        | H5A1         | 0.081781      | HN62        | 0.4115        |
| H5'2                  | 0.0679        | H5'2                  | 0.0679        | H5A2         | 0.081781      | N7          | -0.6073       |
| C4'                   | 0.1065        | C4'                   | 0.1065        | C4A          | 0.011975      | N3          | -0.6997       |
| H4'                   | 0.1174        | H4'                   | 0.1174        | O4'          | -0.183639     | C8          | 0.2006        |
| O4'                   | -0.3548       | O4'                   | -0.3548       | C1A          | -0.373664     | H8          | 0.1553        |
| C1'                   | 0.091595      | C1'                   | 0.483035      | H1A          | 0.386804      | H4A         | 0.23049       |
| H1'                   | 0.150813      | H1'                   | 0.075941      | C2A          | -0.215723     | C3A         | 0.232812      |
| N9                    | -0.075868     | N9                    | -0.351153     | H2A          | 0.245994      | H3A         | 0.170251      |
| C8                    | 0.07491       | C8                    | 0.0375        | O2A          | -0.427945     | O3A         | -0.5246       |
| H8                    | 0.180271      | H81                   | 0.197097      | C1'          | 0.415152      |             |               |
| N7                    | -0.531587     | N7                    | 0.233874      | H1'          | 0.083186      |             |               |
| C5                    | 0.067484      | CM7                   | -0.368449     | C2'          | 0.420531      |             |               |
| C6                    | 0.65836       | HM71                  | 0.180051      | H2'          | -0.032329     |             |               |
| O6                    | -0.580309     | HM72                  | 0.180051      | C3'          | 0.193051      |             |               |
| N1                    | -0.658799     | HM73                  | 0.180051      | H3'          | 0.028531      |             |               |
| H1                    | 0.378871      | C5                    | -0.452906     | C4'          | 0.172609      |             |               |
| C2                    | 0.597736      | C6                    | 0.8095        | H4'          | 0.073578      |             |               |
| N2                    | -0.145837     | O6                    | -0.558777     | C5'          | 0.327854      |             |               |
| CM1                   | -0.278445     | N1                    | -0.768094     | H5'1         | -0.026178     |             |               |
| HM11                  | 0.125637      | HN1                   | 0.423999      | H5'2         | -0.026178     |             |               |
| HM12                  | 0.125637      | C2                    | 1.038857      | O5'          | -0.61577      |             |               |
| HM13                  | 0.125637      | N2                    | -1.07866      | P'           | 1.503572      |             |               |
| CM2                   | -0.278444     | HN21                  | 0.487941      | O2X          | -0.87719      |             |               |
| HM21                  | 0.125637      | HN22                  | 0.487941      | O3X          | -0.87719      |             |               |
| HM22                  | 0.125637      | N3                    | -0.785196     | HO1X         | 0.438961      |             |               |
| HM23                  | 0.125637      | C4                    | 0.663397      | O1X          | -0.763731     |             |               |
| N3                    | -0.575923     | C3'                   | 0.2022        | O3'          | -0.80961      |             |               |
| C4                    | 0.28735       | H3'                   | 0.0615        | HO3'         | 0.534074      |             |               |
| C3'                   | 0.2022        | C2'                   | 0.067         | O2'          | -0.788001     |             |               |
| H3'                   | 0.0615        | H2'1                  | 0.0972        | HO'2         | 0.487615      |             |               |
| C2'                   | 0.067         | O2'                   | -0.6139       | O1'          | -0.555045     |             |               |
| H2'1                  | 0.0972        | HO2'                  | 0.4186        | N9           | -0.025101     |             |               |
| O2'                   | -0.6139       | O3'                   | -0.5246       | C4           | 0.3053        |             |               |
| HO2'                  | 0.4186        |                       |               | C5           | 0.0515        |             |               |
| O3'                   | -0.5246       |                       |               | C6           | 0.7009        |             |               |

| t <sup>6</sup> A |           |      |          | yW   |           |      |           |
|------------------|-----------|------|----------|------|-----------|------|-----------|
| Atom             | Charge    | Atom | Charge   | Atom | Charge    | Atom | Charge    |
| P                | 1.1662    | H152 | 0.061593 | P    | 1.1662    | C15  | 0.416213  |
| O1P              | -0.776    | H153 | 0.061593 | O1P  | -0.776    | H15  | -0.041559 |
| O2P              | -0.776    | C3'  | 0.2022   | O2P  | -0.776    | C16  | 0.6149    |
| O5'              | -0.4989   | H3'  | 0.0615   | O5'  | -0.4989   | O17  | -0.53739  |
| C5'              | 0.0558    | C2'  | 0.067    | C5'  | 0.0558    | O18  | -0.424994 |
| H5'2             | 0.0679    | H2'  | 0.0972   | H5'1 | 0.0679    | C19  | 0.159256  |
| H5'1             | 0.0679    | O2'  | -0.6139  | H5'2 | 0.0679    | H191 | 0.026232  |
| C4'              | 0.1065    | HO'2 | 0.4186   | C4'  | 0.1065    | H192 | 0.026232  |
| H4'              | 0.1174    | O3'  | -0.5246  | H4'  | 0.1174    | H193 | 0.026232  |
| O4'              | -0.3548   |      |          | O4'  | -0.3548   | N20  | -0.932881 |
| C1'              | -0.085723 |      |          | C1'  | 0.191167  | H20  | 0.420465  |
| H1'              | 0.189544  |      |          | H1'  | 0.100834  | C21  | 0.998769  |
| N9               | 0.016959  |      |          | N9   | -0.067783 | O22  | -0.650244 |
| C8               | 0.202397  |      |          | C8   | 0.215094  | O23  | -0.297564 |
| H8               | 0.133014  |      |          | H8   | 0.153545  | C24  | -0.186421 |
| N7               | -0.593702 |      |          | N7   | -0.55884  | H241 | 0.118318  |
| C5               | 0.045686  |      |          | C5   | 0.077045  | H242 | 0.118318  |
| C6               | 0.55803   |      |          | C6   | 0.617249  | H243 | 0.118318  |
| N6               | -0.591393 |      |          | O6   | -0.52166  | C3'  | 0.2022    |
| HN6              | 0.349977  |      |          | N1   | -0.149504 | H3'  | 0.0615    |
| N1               | -0.589285 |      |          | C2   | 0.337632  | C2'  | 0.067     |
| C2               | 0.48629   |      |          | N2   | -0.562283 | H2'  | 0.0972    |
| H2               | 0.076868  |      |          | N3   | -0.092322 | O2'  | -0.6139   |
| N3               | -0.645618 |      |          | H31  | 0.056374  | HO'2 | 0.4186    |
| C4               | 0.354039  |      |          | H32  | 0.056374  | O3'  | -0.5246   |
| C10              | 0.762945  |      |          | H33  | 0.056374  |      |           |
| O10              | -0.658434 |      |          | C3   | 0.034583  |      |           |
| N11              | -0.370628 |      |          | C4   | -0.008591 |      |           |
| HN11             | 0.262234  |      |          | C10  | -0.573403 |      |           |
| C12              | -0.198945 |      |          | H101 | 0.159192  |      |           |
| H12              | 0.088908  |      |          | H102 | 0.159192  |      |           |
| C13              | 0.863589  |      |          | H103 | 0.159192  |      |           |
| ODA              | -0.761017 |      |          | C11  | 0.41044   |      |           |
| ODB              | -0.808249 |      |          | C12  | -0.229091 |      |           |
| C14              | 0.478546  |      |          | C13  | 0.07747   |      |           |
| H14              | 0.019433  |      |          | H131 | 0.031895  |      |           |
| O14              | -0.783782 |      |          | H132 | 0.031895  |      |           |
| HO14             | 0.460398  |      |          | C14  | -0.12428  |      |           |
| C15              | -0.33086  |      |          | H141 | 0.053005  |      |           |
| H151             | 0.061593  |      |          | H142 | 0.053005  |      |           |
